# Supplementary material for: Organ-on-a-chip with integrated semitransparent organic electrodes for barrier function monitoring
Source: Royal Society of Chemistry journal article supplement (doi:10.1039/d2lc01097f), 2023-01-01
Supplement: d2lc01097f1.pdf [file d2lc01097f1.pdf]

## Supplementary

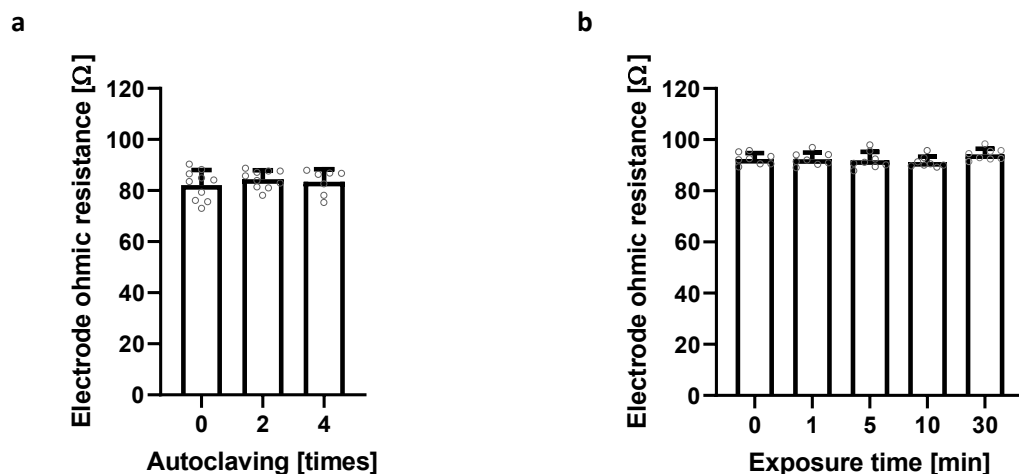

**SFig. 1.** **a)** Ohmic resistance of electrodes after autoclaving cycles ( $n=10$ ). **b)** Ohmic resistance of electrodes after being exposed to ethanol ( $n=8$ ).

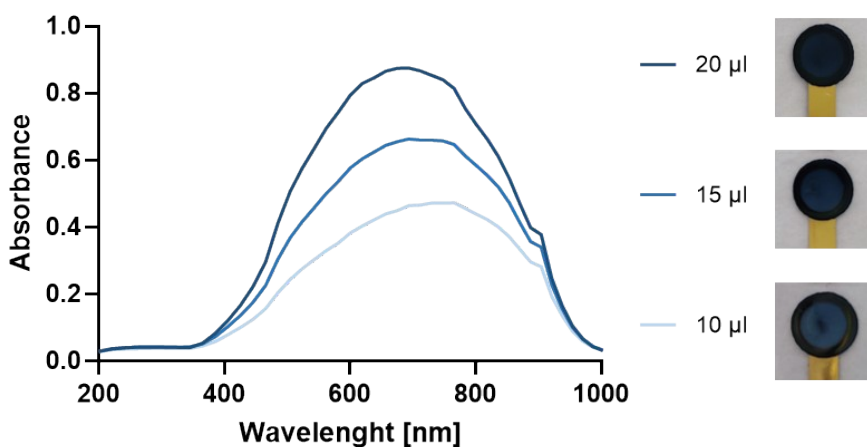

**SFig. 2.** Absorbance spectra of PEDOT:PSS electrodes at different drop casting volumes: 20, 15, and 10  $\mu\text{l}$ .

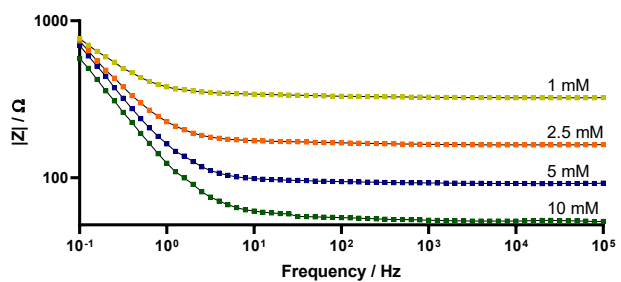

**SFig. 3.** Impedance spectra of PEDOT:PSS electrodes under different PBS molarities.

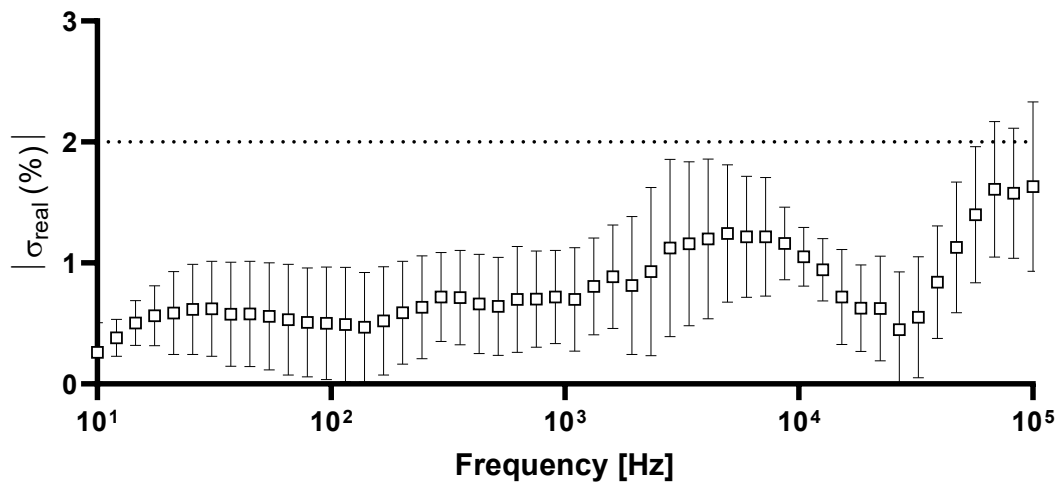

**SFig. 4.** Residual error plots for the real impedance data as a function of frequency ( $n=12$ ). Measurement error is less than 2%.

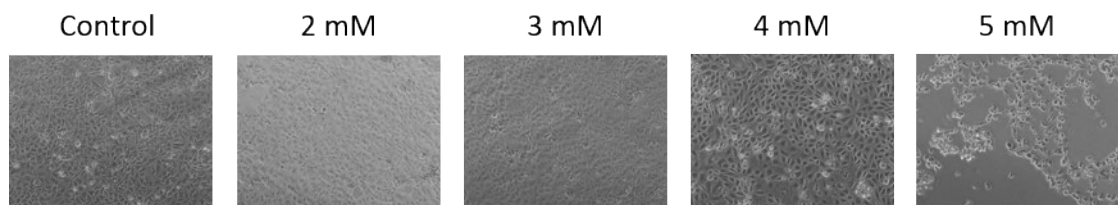

**SFig. 5.** Effect of EDTA concentration on Caco-2 cells grown on a 24-well plate for 7 days. Microscopic images of cells exposed to 4 different EDTA concentrations (2 mM, 3 mM, 4 mM, and 5 mM) for 30 min.
